# Supplementary material
Source: publisher figshare collection journal article supplement (https://karger.figshare.com/ndownloader/files/25444688)
Supplement: Supplementary file 1 [file 25444688]

## Table S3. Binding of lifespan-regulatory transcription factors to C. elegans B4GALT-genes.

| **Transcription**  **factor** | ***bre-4*** | | ***sqv-3*** | | ***W02B12.11*** | |
| --- | --- | --- | --- | --- | --- | --- |
| **YA** | **L4** | **YA** | **L4** | **YA** | **L4** |
| **DAF-12** |  |  |  |  |  |  |
| **DAF-16** |  | 1 |  | 1 |  | 1 |
| **DVE-1** |  | 1 |  | 1 |  | 1 |
| **HIF-1** |  | 1 |  | 1 |  | 1 |
| **HLH-30** |  | 1 |  | 1 |  | 0 |
| **MDL-1** |  | 1 |  | 1 |  | 1 |
| **MML-1** |  |  |  |  |  |  |
| **MXL-1** | 0 |  | 0 |  | 0 |  |
| **NHR-80** | 1 |  | 1 |  | 1 |  |
| **PHA-4** | 1 | 1 | 1 | 0 | 0 | 1 |
| **SKN-1** |  | 0 |  | 1 |  | 0 |
| **UNC-62** |  | 0 |  | 1 |  | 0 |
| **XBP-1** |  |  |  |  |  |  |

CHIP-seq data generated by the modERN-consortium (supplementary reference [22]) on selected lifespan-regulatory transcription factors (reviewed in supplementary reference [24]) was searched for binding to the three *C. elegans* B4GALT-genes in young adult (YA) and L4 worms. These life cycle stages are closest to the ages at which worms were analysed for B4GALT-expression in our study. Binding of a given factor is indicated by “1”, the absence of binding by “0”. Note that not all transcription factors considered in this analysis were examined by supplementary reference [22] in young adults and/or L4.
